# Supplementary material for: Holotomography-Based, Label-Free Quantification of Cellular Dry Mass as a Biophysical Indicator of Microglial Aβ Phagocytosis during Senescence
Source: Research Square preprint supplement (doi:10.21203/rs.3.rs-8690474/v1), 2026-02-02
Supplement: Supplementary file 1 [file 4a2b02862359874a5ddc05d1.docx]

***Holotomography-Based, Label-Free Quantification of Cellular Dry Mass as a Biophysical Indicator of Microglial Aβ Phagocytosis during Senescence***

Sunjeet Sahaa#, Amarnath Singama#, Melanie Whiteb,c, Colbey Kimbela, Nikita Gopakumara, Jeong Hee Kimd, Jingchun Chene,f,g, Ashkan Salamatb,c, Seungman Parka,h*

a Department of Mechanical Engineering, University of Nevada, Las Vegas, Las Vegas, NV 89154, USA

b Nevada Extreme Conditions Laboratory, University of Nevada, Las Vegas, Las Vegas, NV 89154, USA

c Department of Physics & Astronomy, University of Nevada, Las Vegas, Las Vegas, NV 89154, USA

d Department of Mechanical Engineering, Iowa State University, Ames, IA 50011, USA

e Nevada Institute for Personalized Medicine, University of Nevada, Las Vegas, Las Vegas, NV 89154, USA

f Interdisciplinary Neuroscience Program, University of Nevada, Las Vegas, Las Vegas, NV 89154, USA

g School of Life Science, University of Nevada, Las Vegas, Las Vegas, NV 89154, USA

h Interdisciplinary Biomedical Engineering Program, University of Nevada, Las Vegas, Las Vegas, NV 89154, USA

**
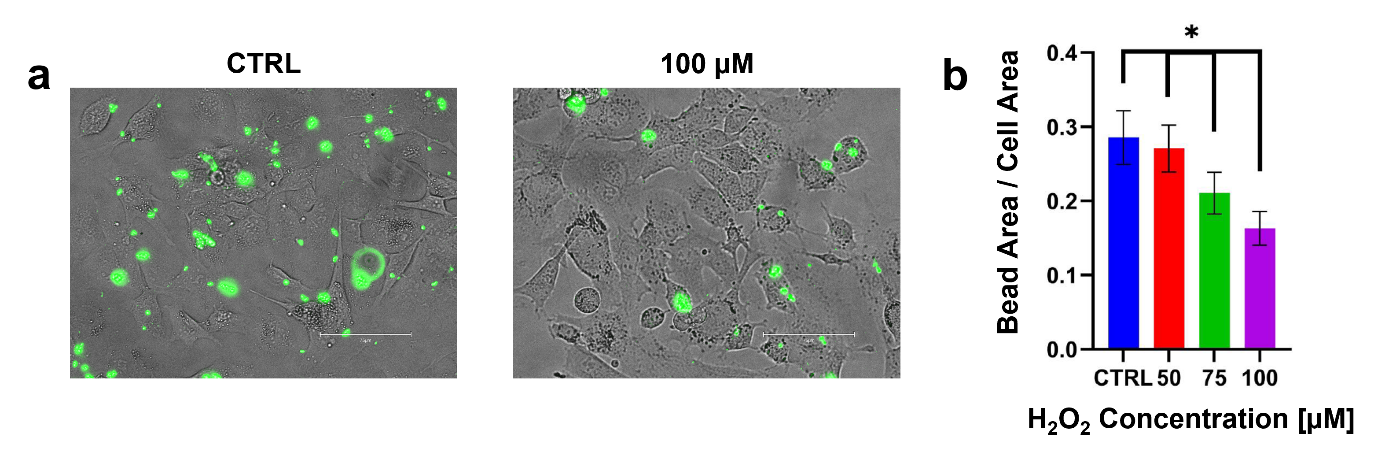
**

**Fig. S1.** Microglial phagocytosis assay using IgG–FITC–labeled beads. (a) Fluorescence images showing internalized IgG–FITC–labeled beads in control and H2O2-treated (100 μM) microglial cells. (b) Quantification of phagocytosis, expressed as the percentage of bead area relative to total cell area. **p* < 0.05.


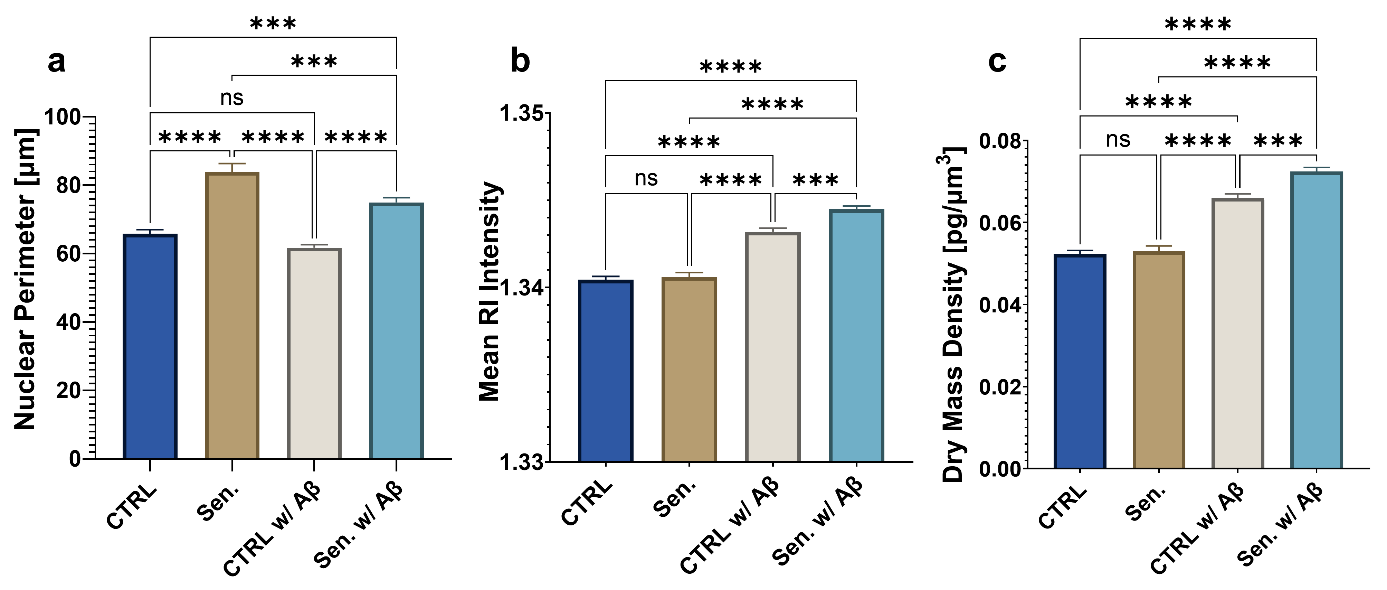


**Fig. S2**. Quantification of biophysical properties, including nuclear perimeter (a), mean refractive index intensity (b), and dry mass density (c).
